# Supplementary material for: Discovery of 3-hydroxy-3-pyrrolin-2-one-based mPGES-1 inhibitors using a multi-step virtual screening protocol
Source: Royal Society of Chemistry journal article supplement (doi:10.1039/c8md00497h), 2018-01-01

## Supporting Information

# Discovery of 3-hydroxy-3-pyrrolin-2-one-based mPGES-1 inhibitors using a multi-step virtual screening protocol

Gianluigi Lauro,<sup>a</sup> Vincenza Cantone,<sup>a</sup> Marianna Potenza,<sup>a</sup> Katrin Fischer,<sup>b</sup> Andreas Koeberle,<sup>b</sup>  
Oliver Werz,<sup>b</sup> Raffaele Riccio,<sup>a</sup> and Giuseppe Bifulco<sup>a,\*</sup>

<sup>a</sup>Department of Pharmacy, University of Salerno, via Giovanni Paolo II 132, 84084 Fisciano, Italy

<sup>b</sup>Department of Pharmaceutical/Medicinal Chemistry, Institute of Pharmacy, Friedrich-Schiller-  
University Jena, Philosophenweg 14, D-07743 Jena, Germany

\*To whom correspondence should be addressed: [bifulco@unisa.it](mailto:bifulco@unisa.it), Telephone: +39 (0)89 969741

### List of Contents

**Figures S1-S8** <sup>1</sup>H NMR spectra of compounds **1-8** ..... S1-S9

**Figure S9** Analytical reversed-phase HPLC of compounds **2** (A) and **3** (B).... S10

Figure S1. <sup>1</sup>H NMR spectrum of compound 1, as provided by Otava Ltd.

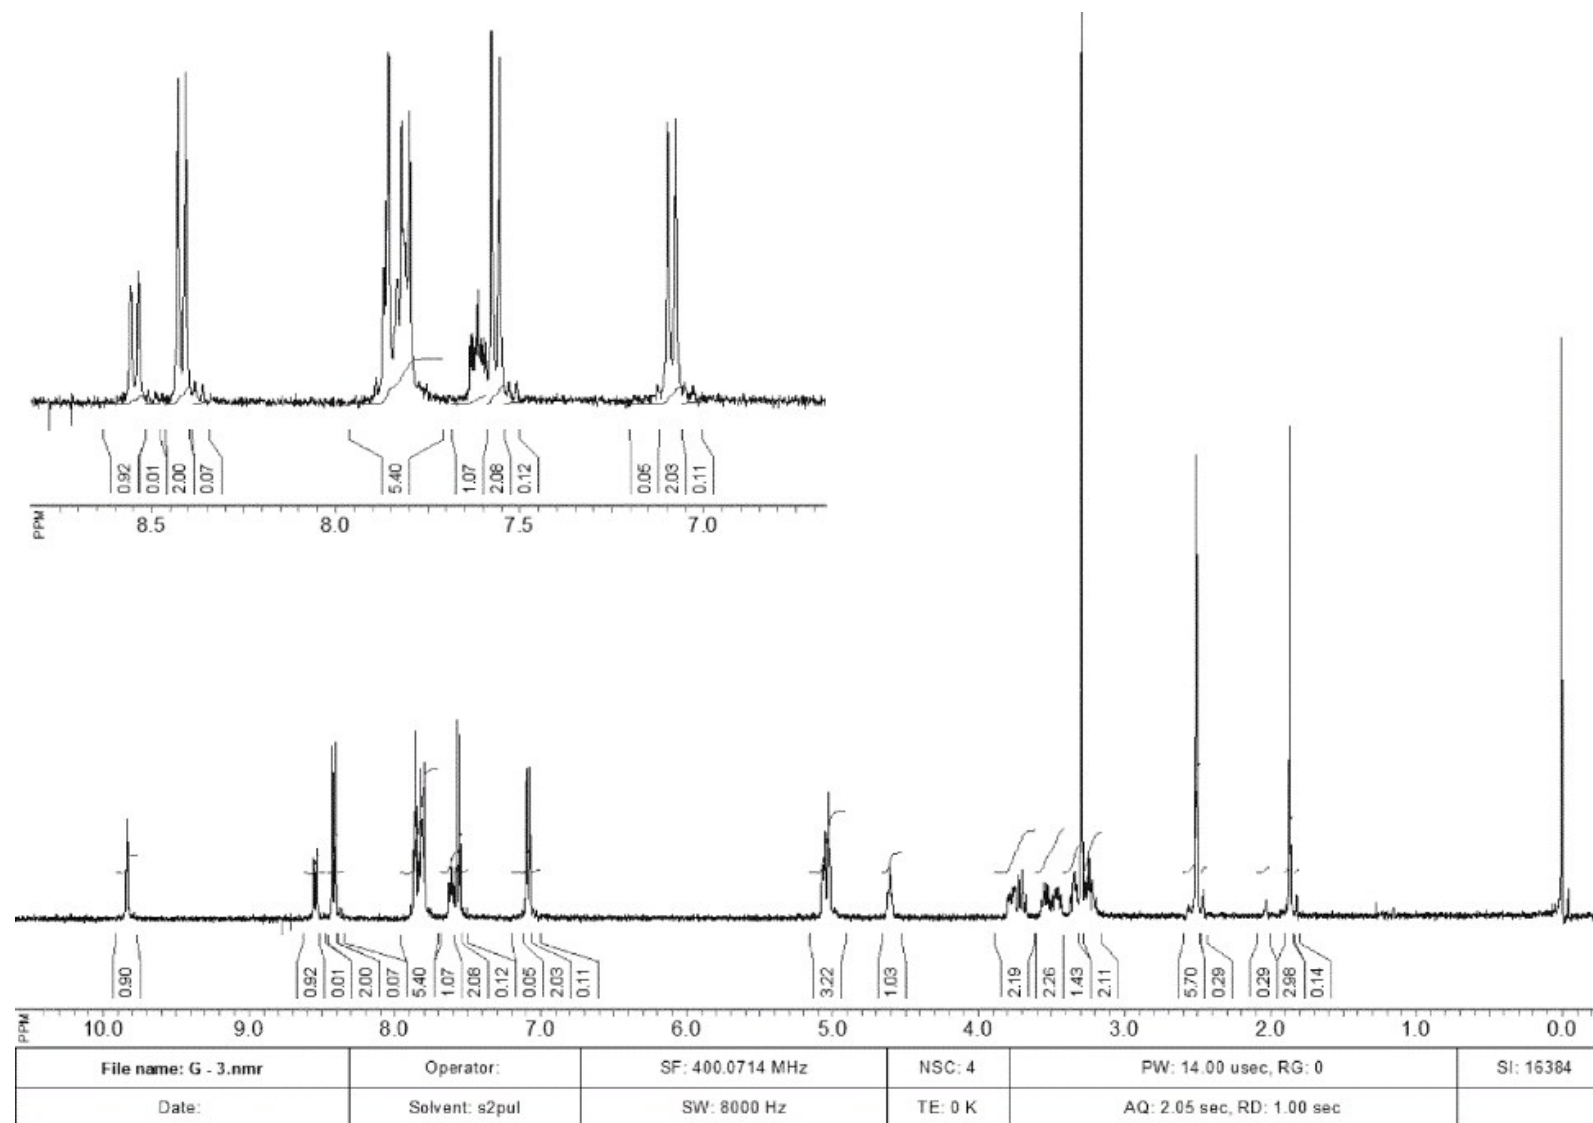

Figure S2. <sup>1</sup>H NMR spectrum of compound 2, as provided by Otava Ltd.

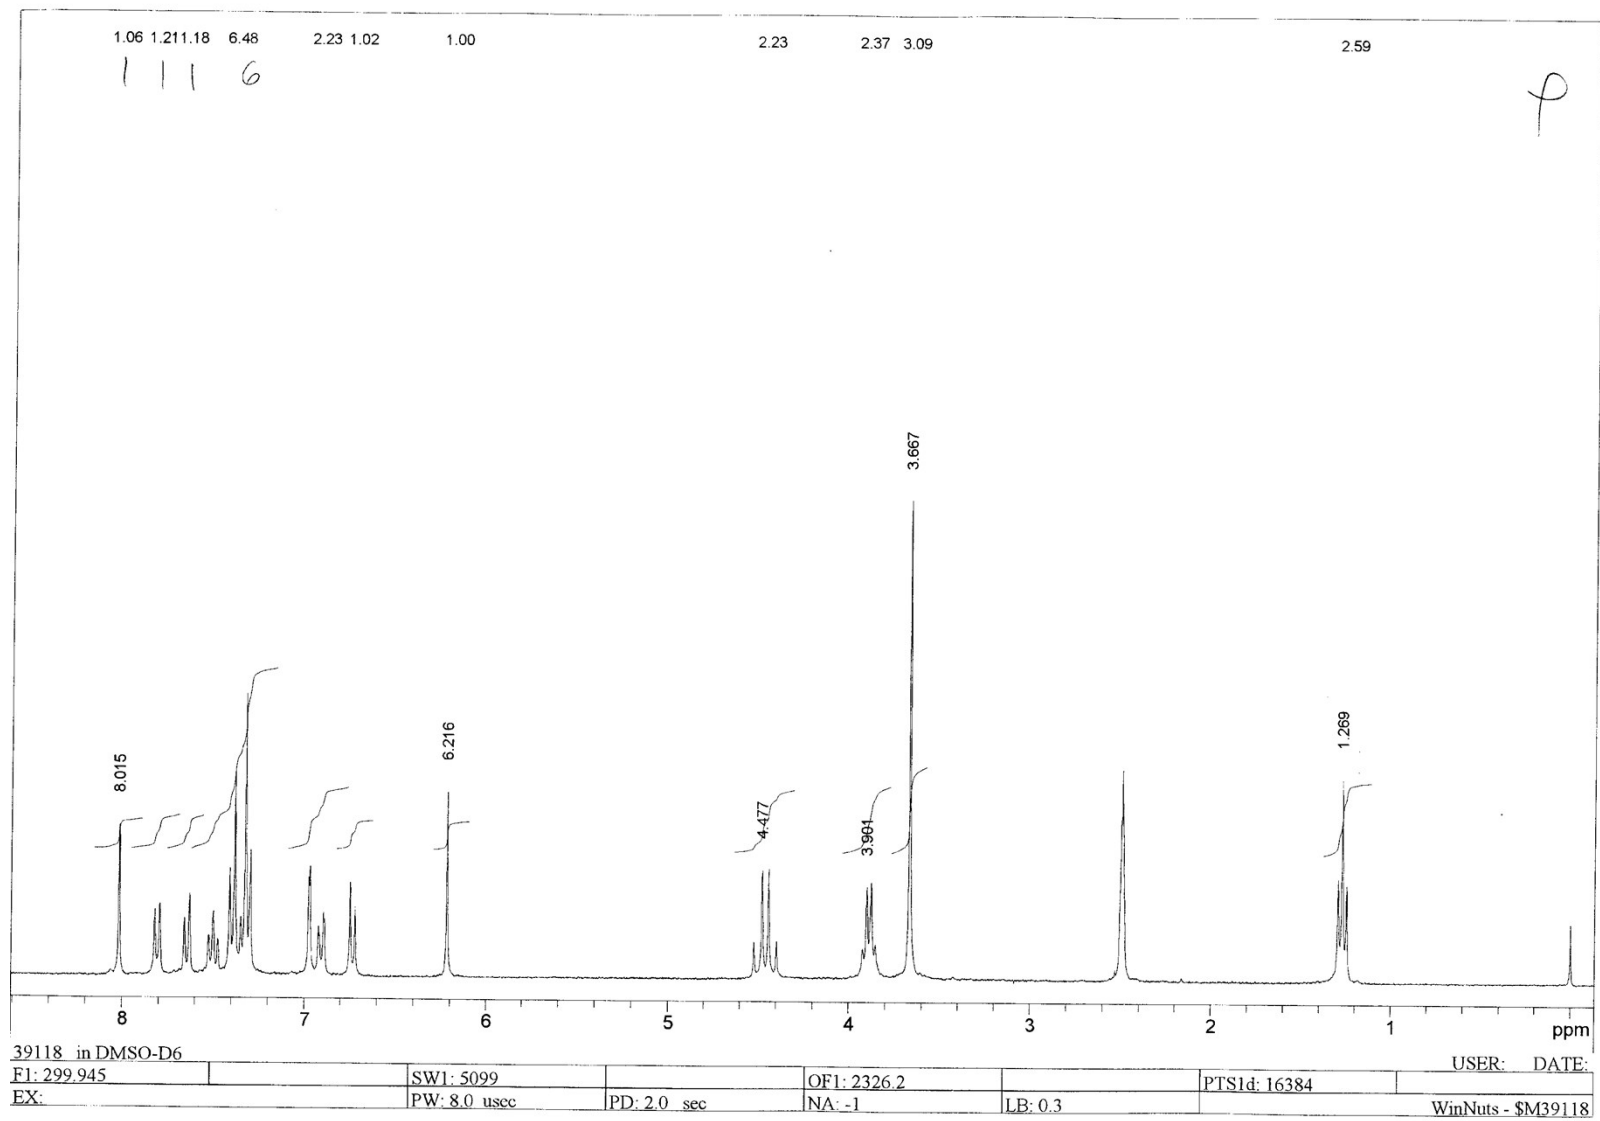

Figure S3. <sup>1</sup>H NMR spectrum of compound 3, as provided by Otava Ltd.

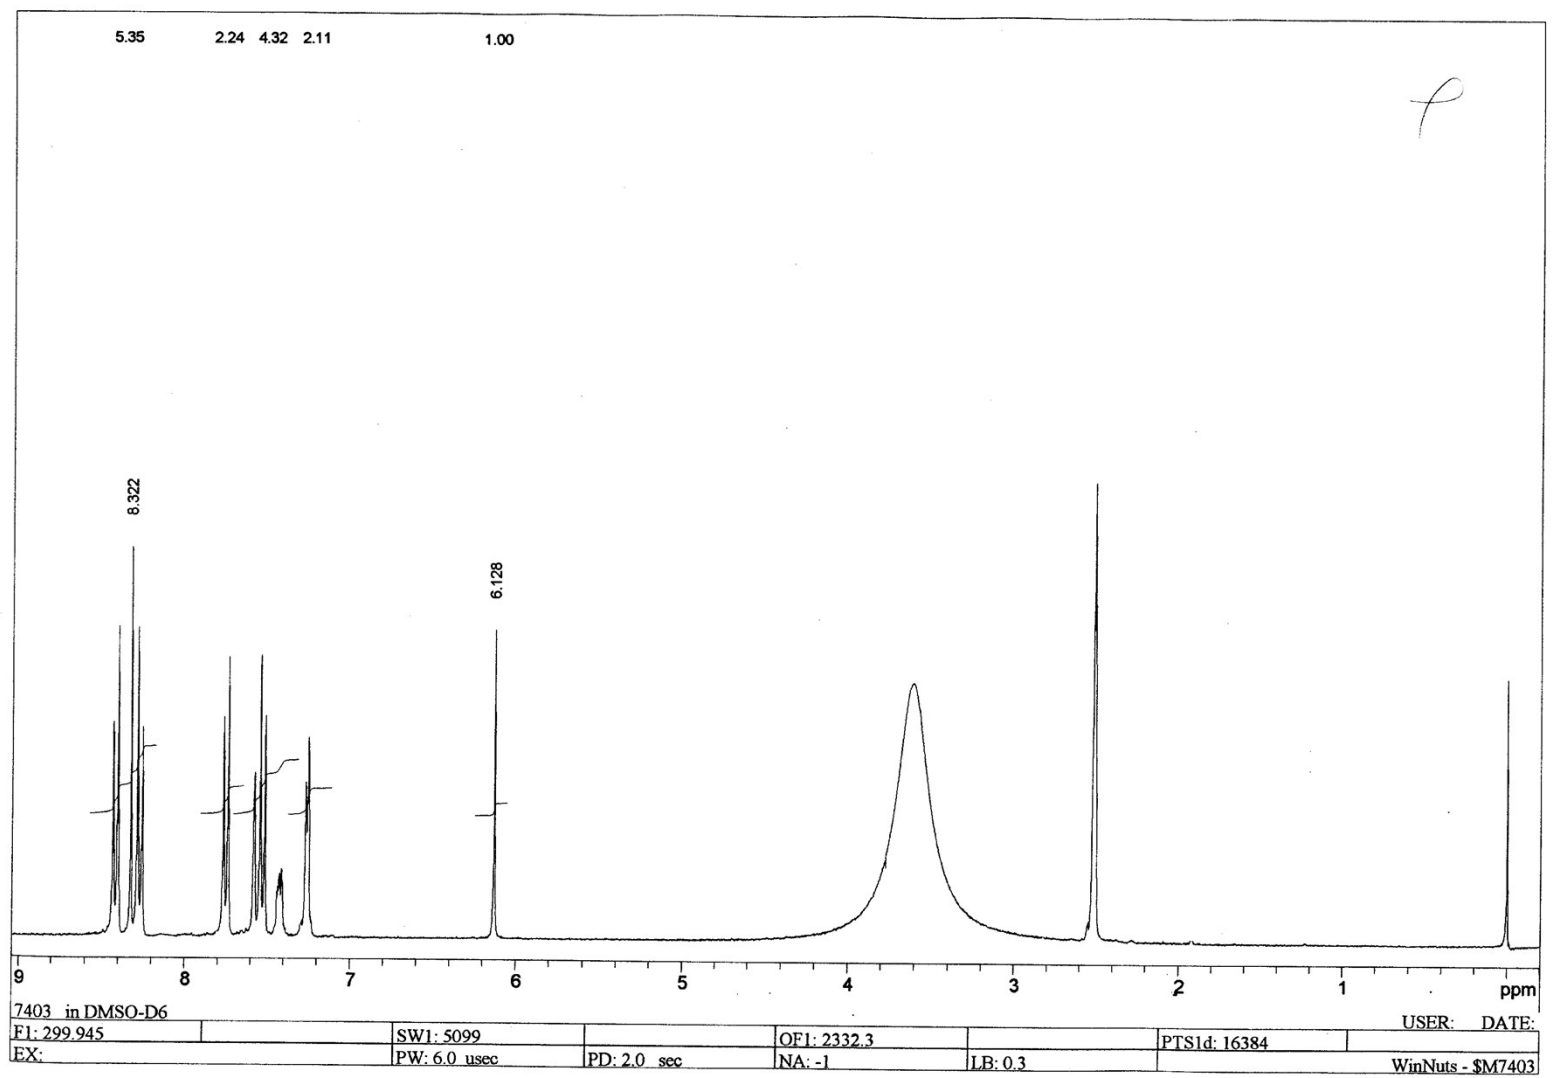

Figure S4. <sup>1</sup>H NMR spectrum of compound 4, as provided by Otava Ltd.

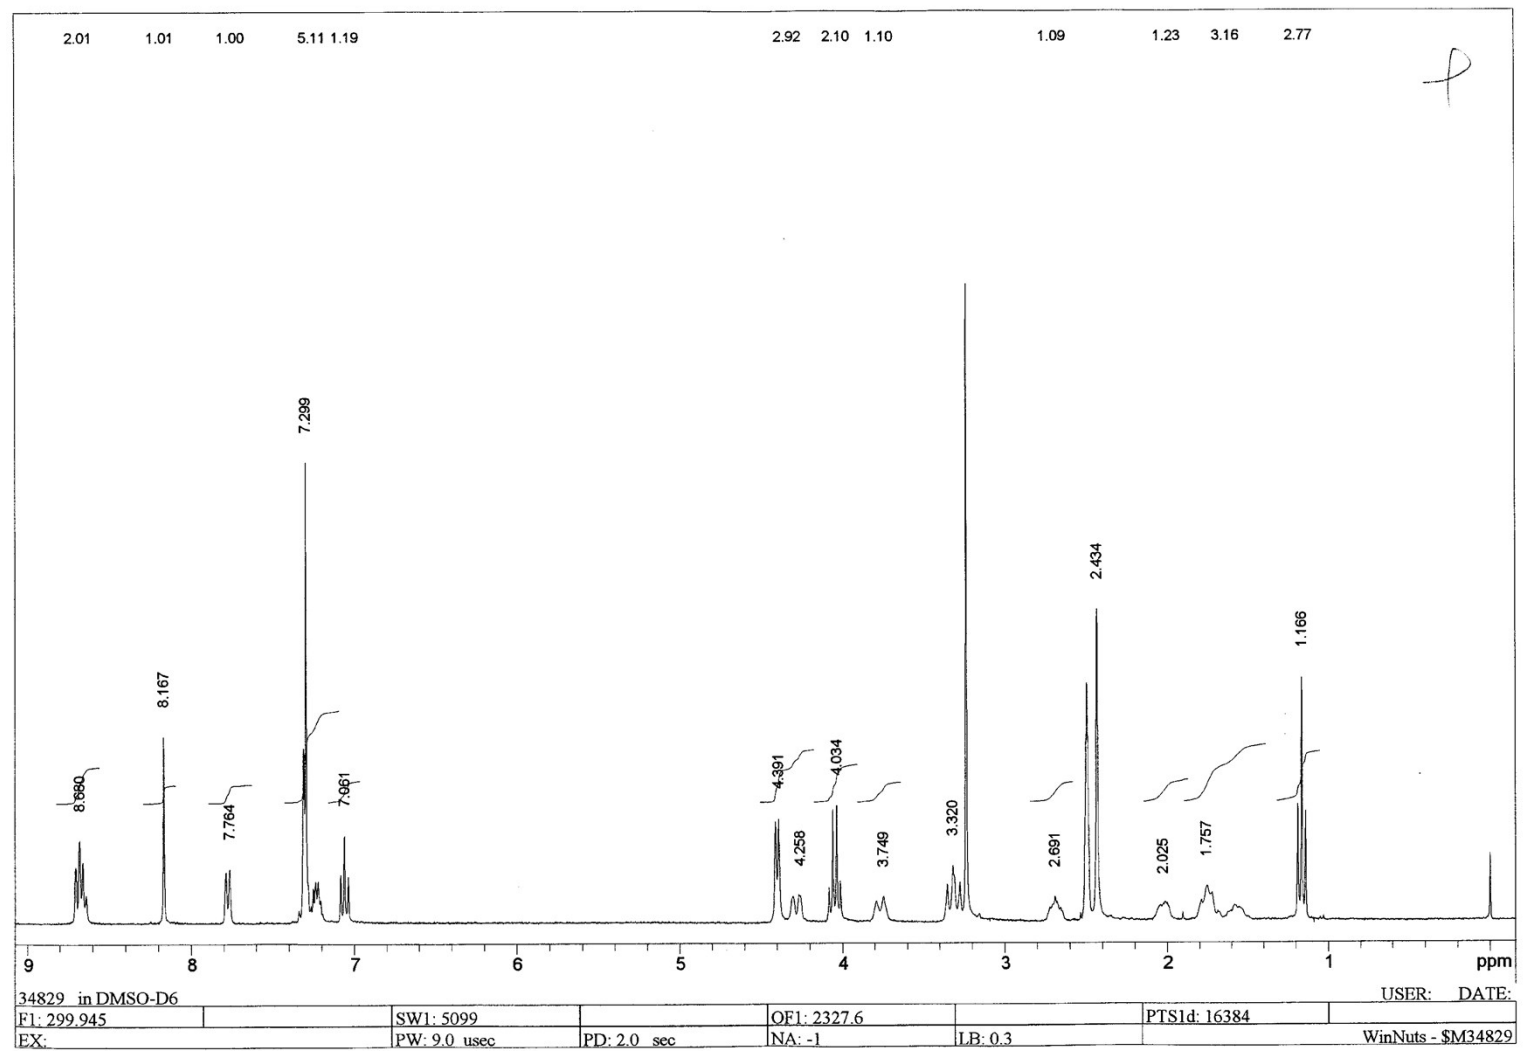

**Figure S5.**  $^1\text{H}$  NMR spectrum of compound **5**, as provided by Otava Ltd.

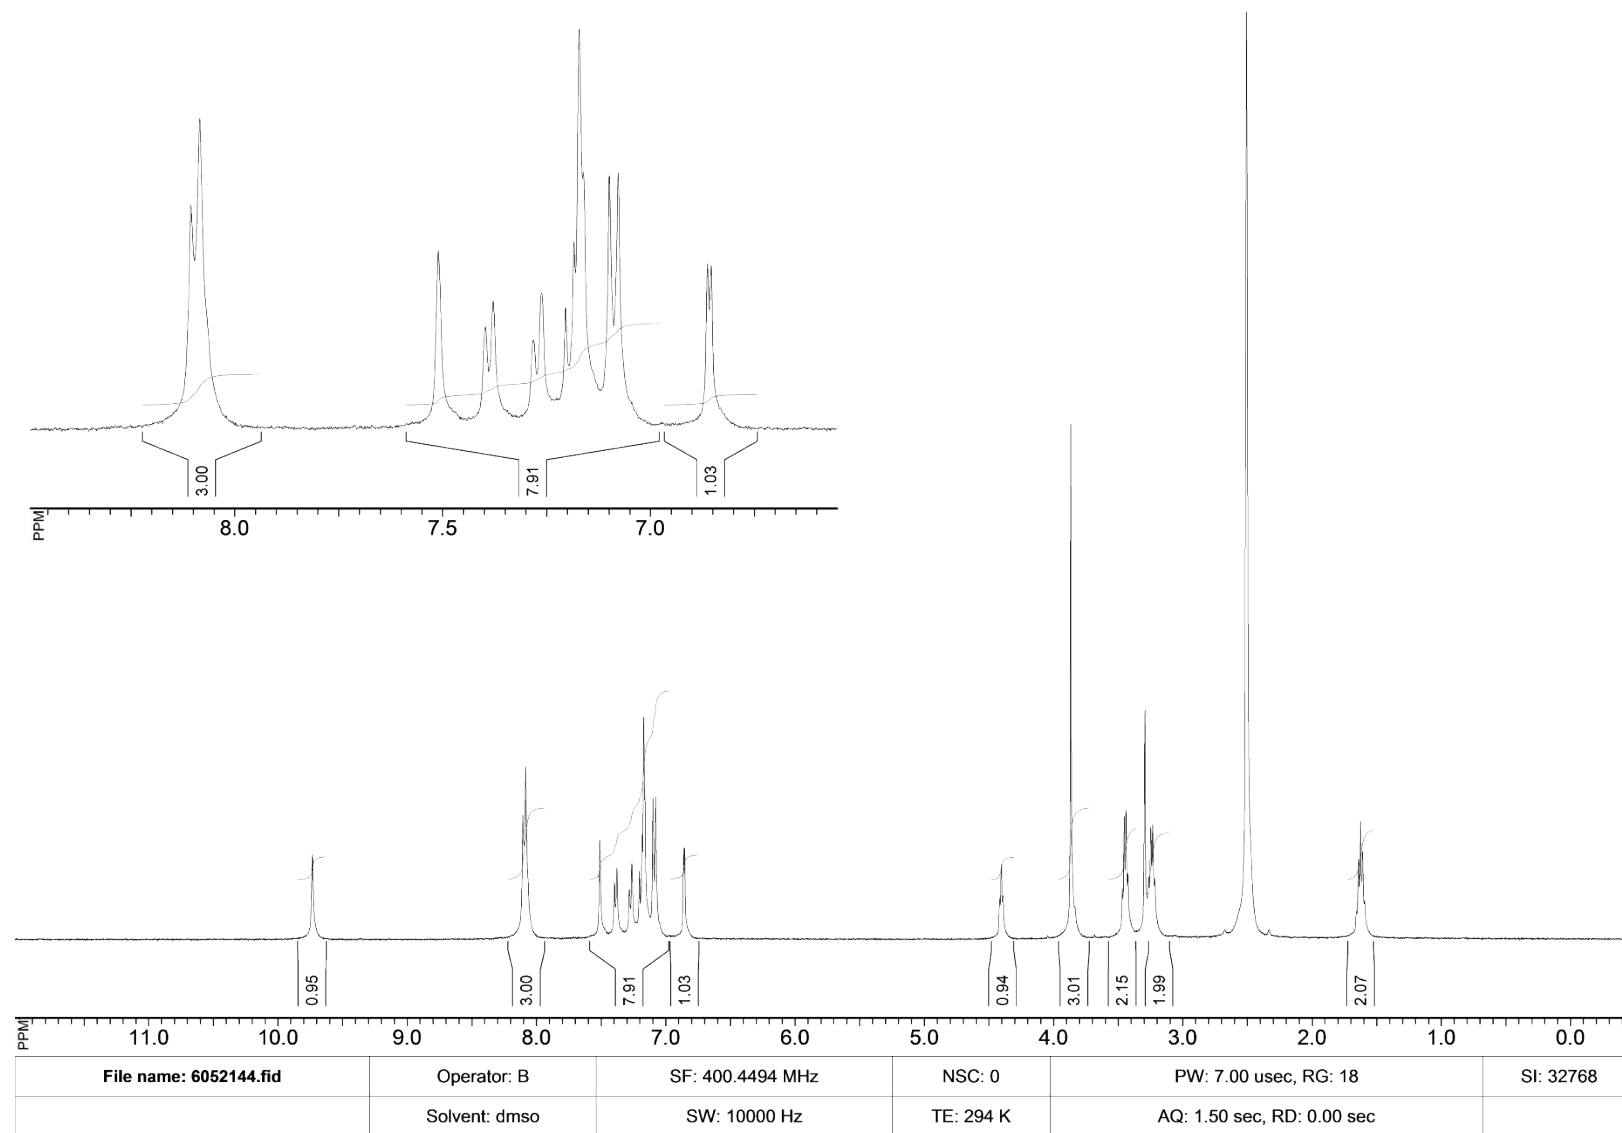

Figure S6. <sup>1</sup>H NMR spectrum of compound **6**, as provided by Otava Ltd.

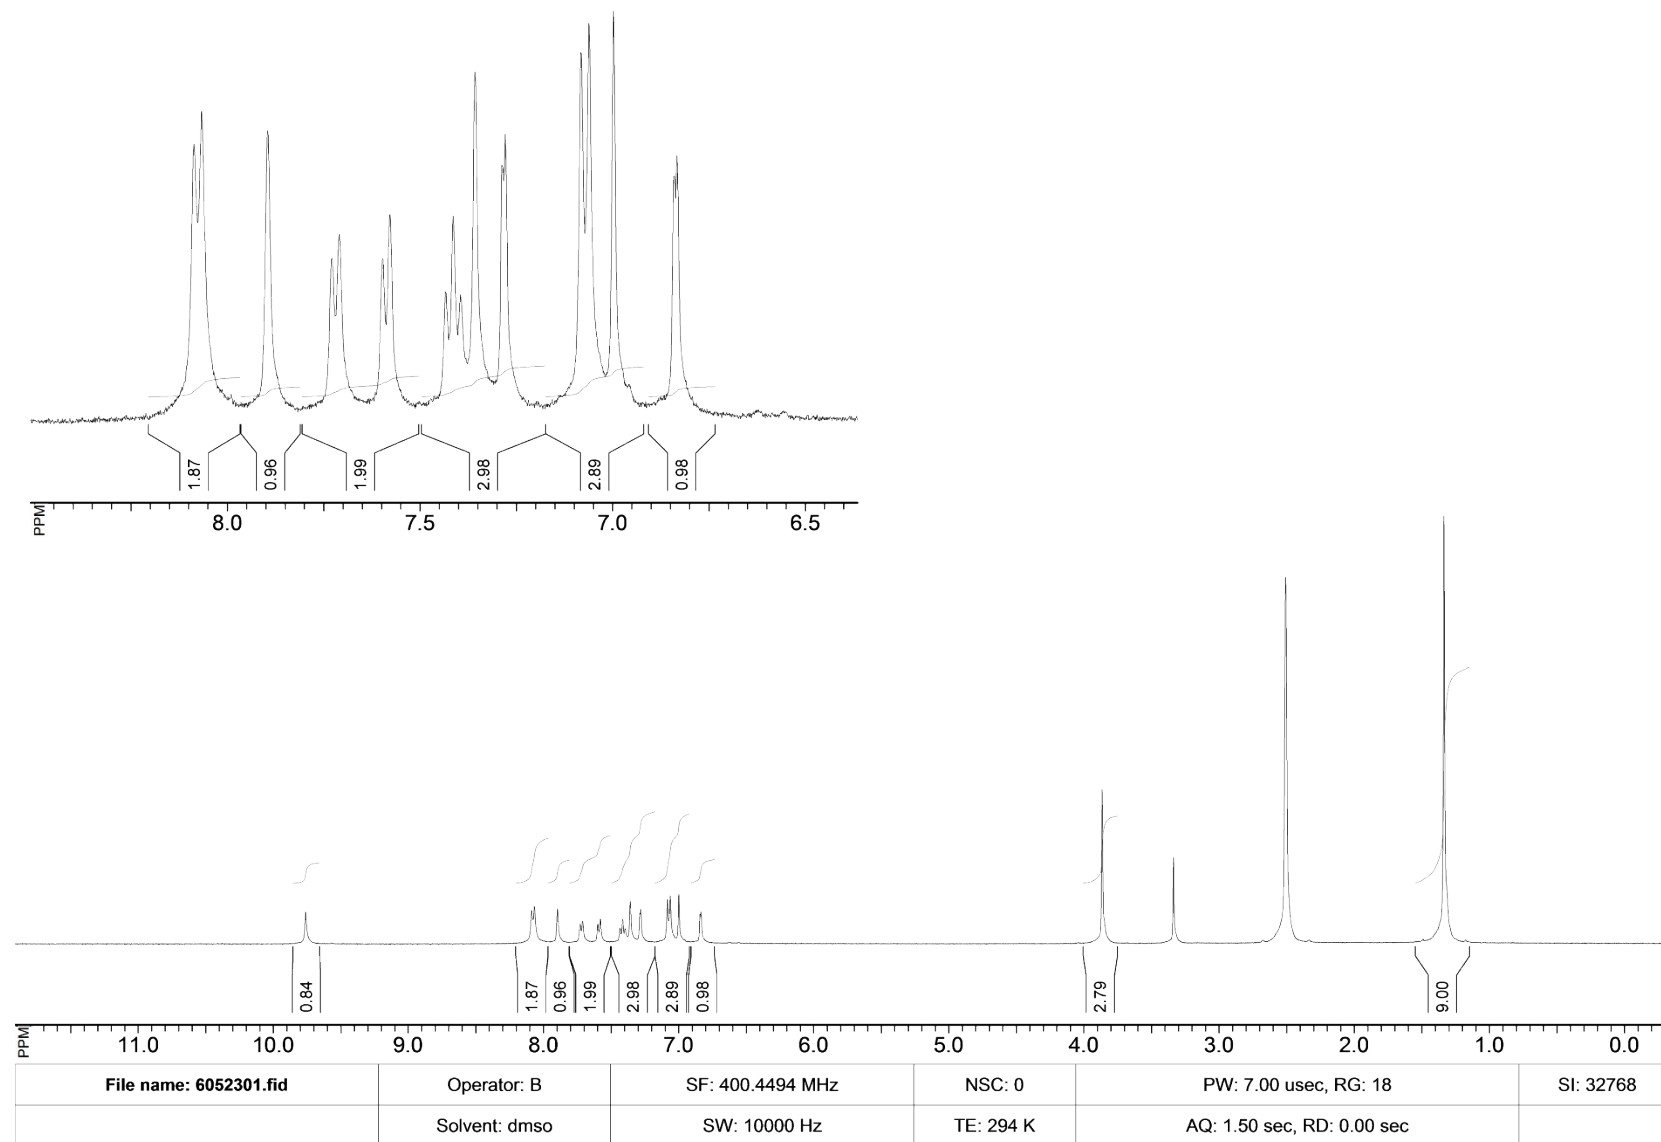

Figure S7. <sup>1</sup>H NMR spectrum of compound 7, as provided by Otava Ltd.

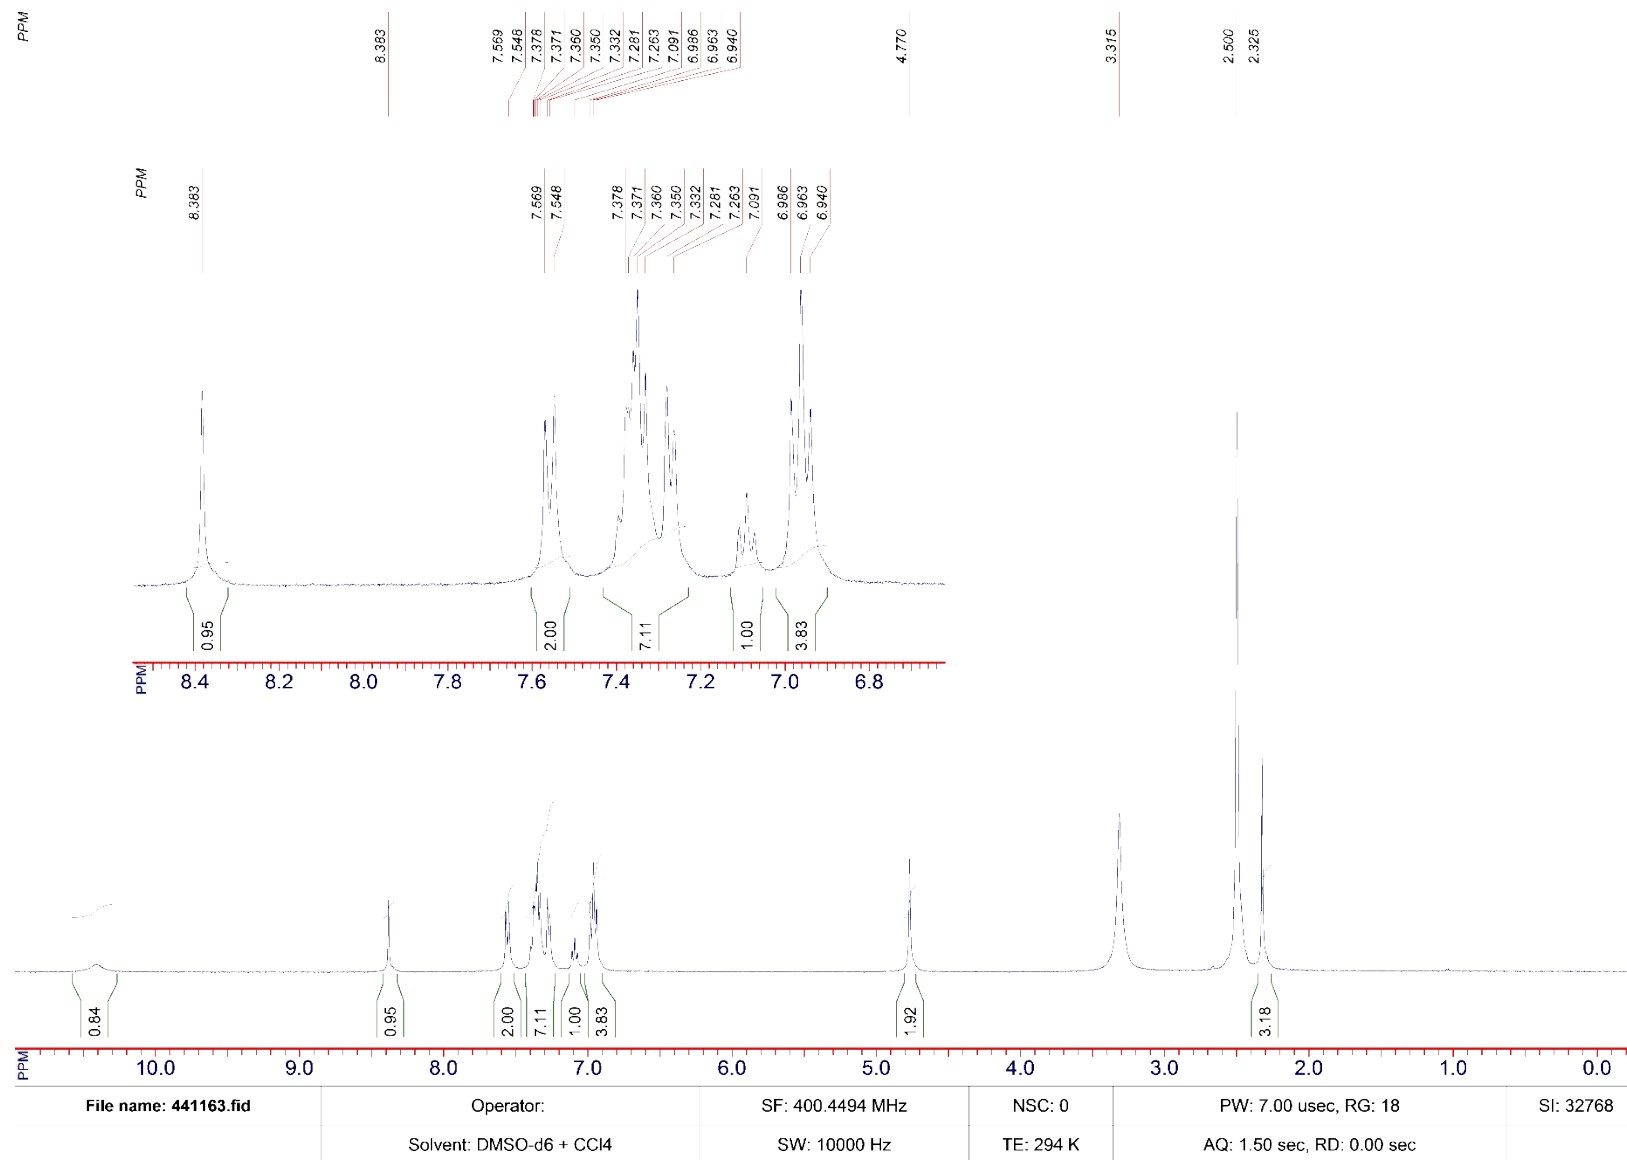



**Figure S8.**  $^1\text{H}$  NMR spectrum of compound **8**, as provided by Otava Ltd.

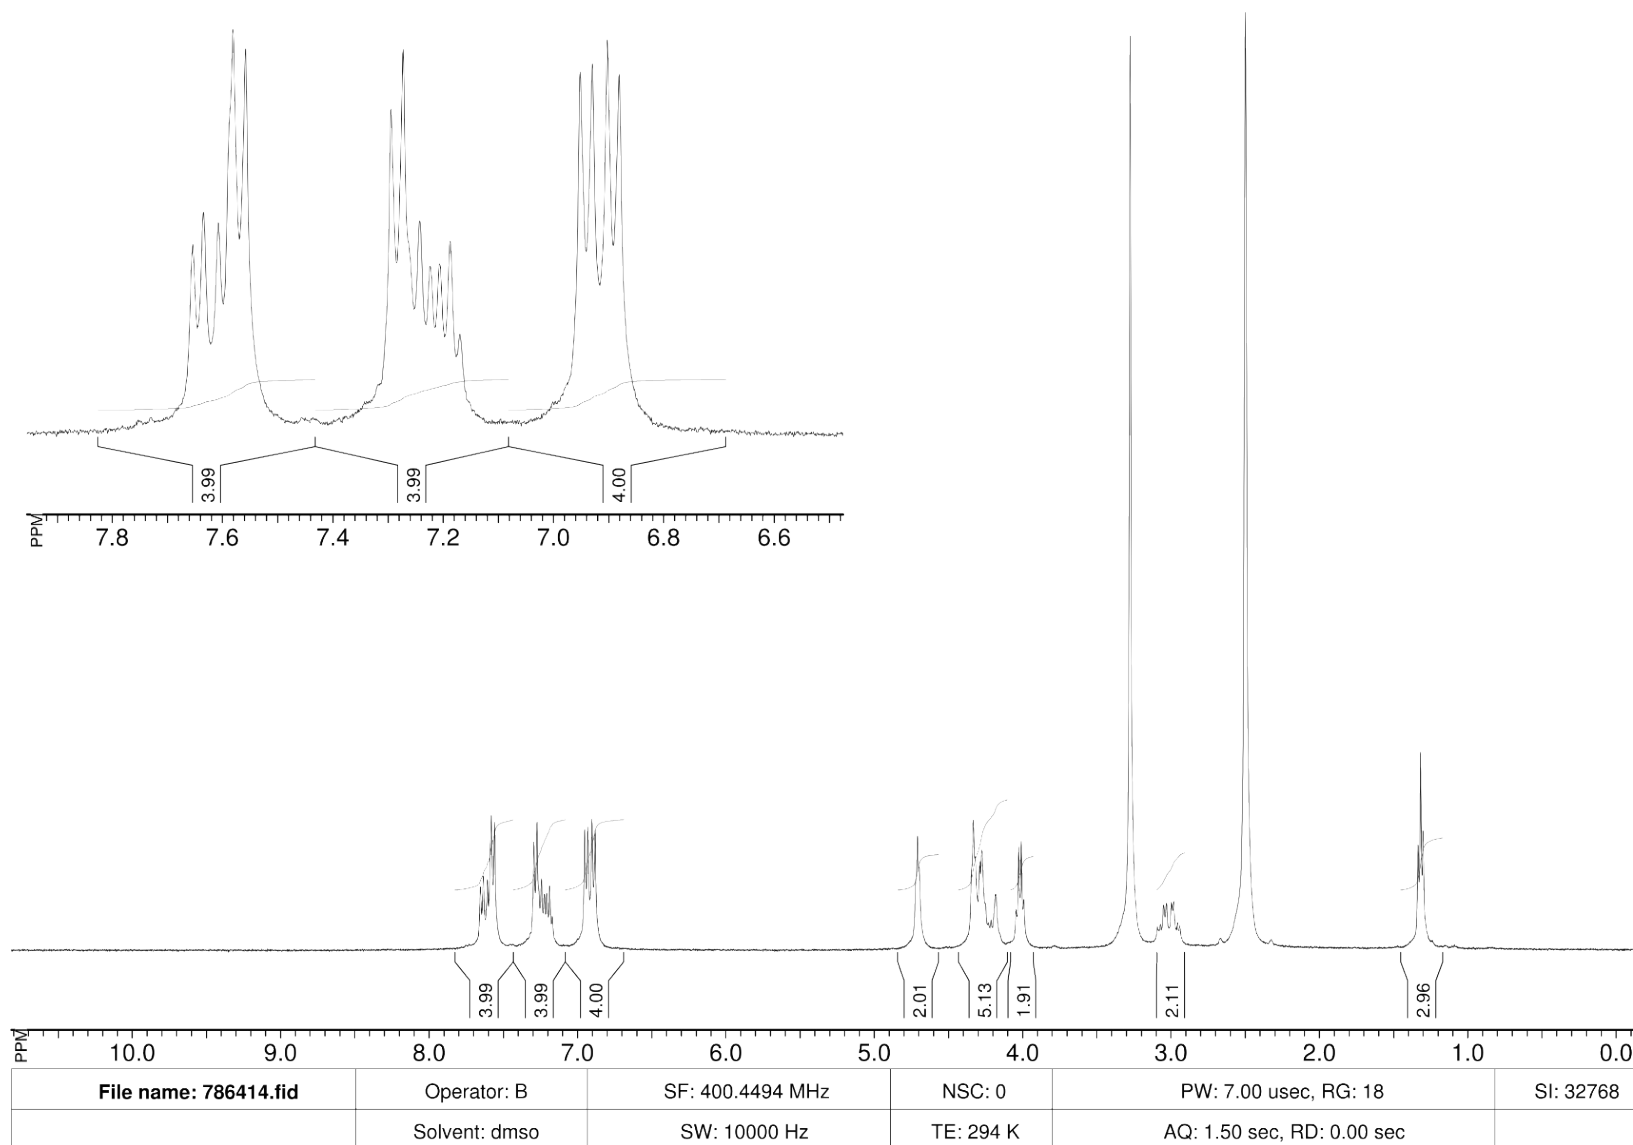

**Figure S9.** Analytical reversed-phase HPLC of compounds **2** (A) and **3** (B).

**A**

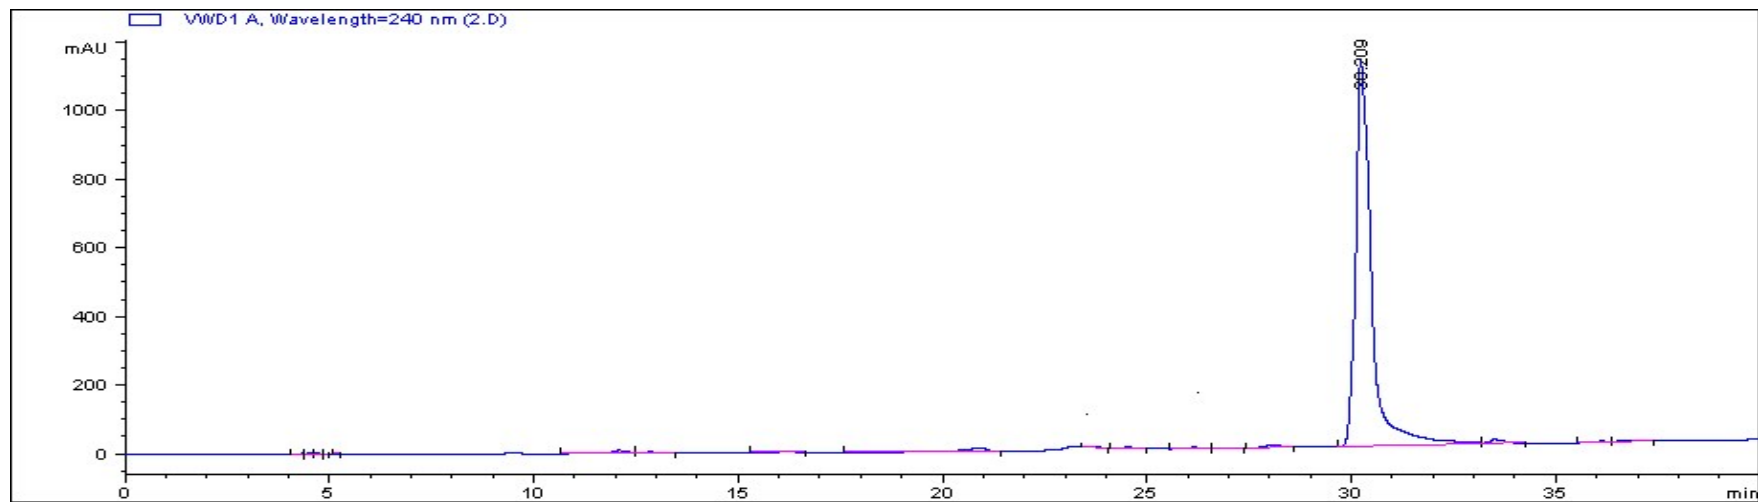

**B**

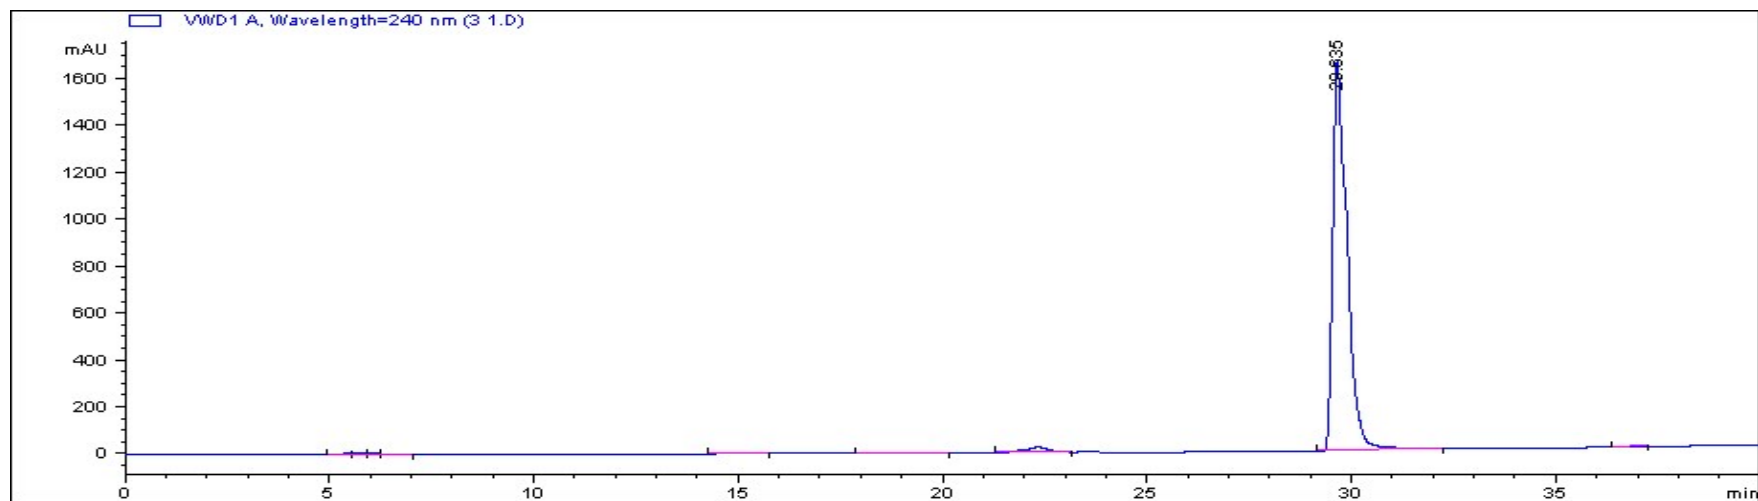

Supplement: c8md00497h1.pdf [file c8md00497h1.pdf]
